# Supplementary material
Source: PubMed Central journal article supplement (PMC6824492)
Supplement: 10.1194_P093427_jlr.P093427-1.pdf [file 10.1194_P093427_jlr.P093427-1.pdf]

# <sup>1</sup>Supplementary Material

## Supplementary Tables

**Supplemental Table S1. Antibodies for magnetic bead sorting, immunoblotting and immunofluorescence (IF)**

| <b>antibody</b> | <b>company</b>               | <b>product #</b> | <b>lot #</b> | <b>dilution immunoblot</b> | <b>dilution IF</b> |
|-----------------|------------------------------|------------------|--------------|----------------------------|--------------------|
| ABCA1           | Abcam                        | ab18180          | GR130756-1   | 1:1000                     | 1:100              |
| CGB             | DAKO                         | A0231            | -            | 1:1000                     | 1:100              |
| CK7             | Dako                         | M7018            | 20028070     | -                          | 1:100              |
| DAO             | Sigma                        | HPA031033        | -            | 1:1000                     | -                  |
| EGFR            | Cell Signaling               | 4267S            | 11           | 1:1000                     | -                  |
| GAPDH           | Cell Signaling               | 2118             | 8            | 1:1000                     | -                  |
| HLAG            | EXBIO                        | 11-291-M001      | 527350       | 1:100                      | -                  |
| HMGCR           | Sigma-Aldrich                | AMAB90619        | 02949        | 1:500                      |                    |
| HSD3B1          | Sigma-Aldrich                | HPA043264        | A115246      | 1:1000                     | 1:100              |
| ITGA1           | Millipore                    | MAB1973          | -            | -                          | 1:100              |
| LRP1            | Abcam                        | ab92544          | GR208758-1   | 1:1000                     | -                  |
| SR-BI           | BD Transduction Laboratories | 610882           | T40262160652 | 1:500                      | -                  |

---

<sup>1</sup>Supplementary material to Vondra et al, Cholesterol metabolism in trophoblasts

**Supplemental Table S2. Taqman primer IDs.** Assays were purchased from Thermo Fisher Scientific (Waltham, MA, US).

| <b>primer</b> | <b>official gene name</b> | <b>taqman ID</b> |
|---------------|---------------------------|------------------|
| GAPDH         | GAPDH                     | Hs99999905_m1    |
| LDLR          | LDLR                      | Hs00181192_m1    |
| SR-BI         | SCARB1                    | Hs00969821_m1    |
| LRP1          | LRP1                      | Hs00233856_m1    |
| HMGCR         | HMGCR                     | Hs00168352_m1    |
| SREBP2        | SREBF2                    | Hs01081748_m1    |
| LXR $\beta$   | NR1H2                     | Hs01027215_g1    |
| LXR $\alpha$  | NR1H3                     | Hs00172885_m1    |
| ABCA1         | ABCA1                     | Hs00194045_m1    |
| IDOL          | MYLIP                     | Hs00203131_m1    |
| CYP11A1       | CYP11A1                   | Hs00167984_m1    |
| HSD3B1        | HSD3B1                    | Hs04194787_g1    |

# Supplementary Figures

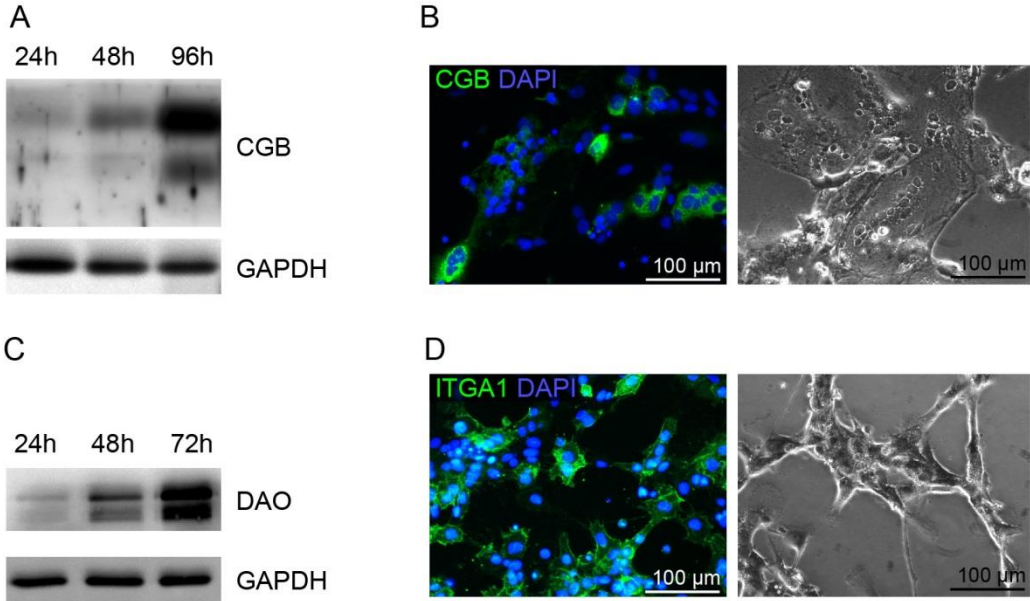

**Supplemental Figure S1. Phenotypic characterization of extravillous trophoblast (EVT) and syncytiotrophoblast (STB) cultures.** Representative analyses of STB (A, B) and EVT (C, D) cultures from human first trimester placenta are shown. CGB: chorionic gonadotropin; DAO: diamine oxidase; ITGA1: integrin subunit alpha 1

**Bar chart of Cellular Component categories**

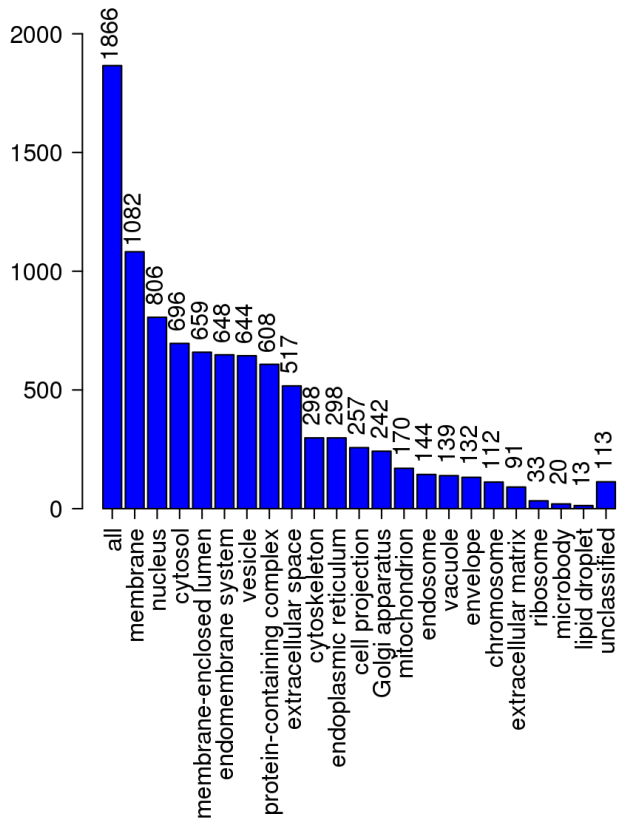

**Bar chart of Molecular Function categories**

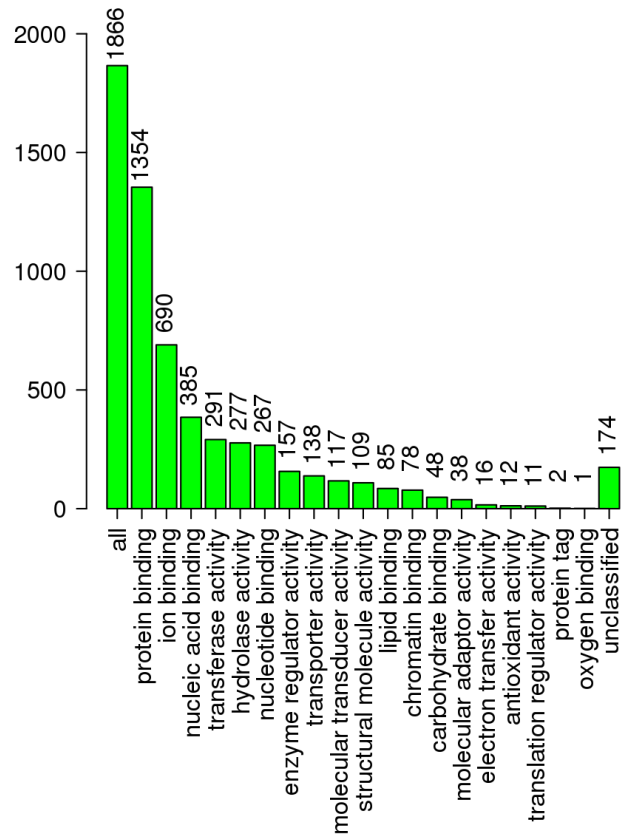

**Supplemental Figure S2. Gene ontology (GO) enrichment analysis of RNA-seq data.**

Primary human trophoblasts were isolated from first term placenta tissue and separated into EGFR+ vCTBs and HLAG+ EVT<sub>s</sub>. RNA was isolated and quantified by RNA-seq. Differentially expressed genes were analyzed according to their gene ontology (GO) annotations. The y-axis represents the number absolute frequency of differentially expressed genes in the respective category.

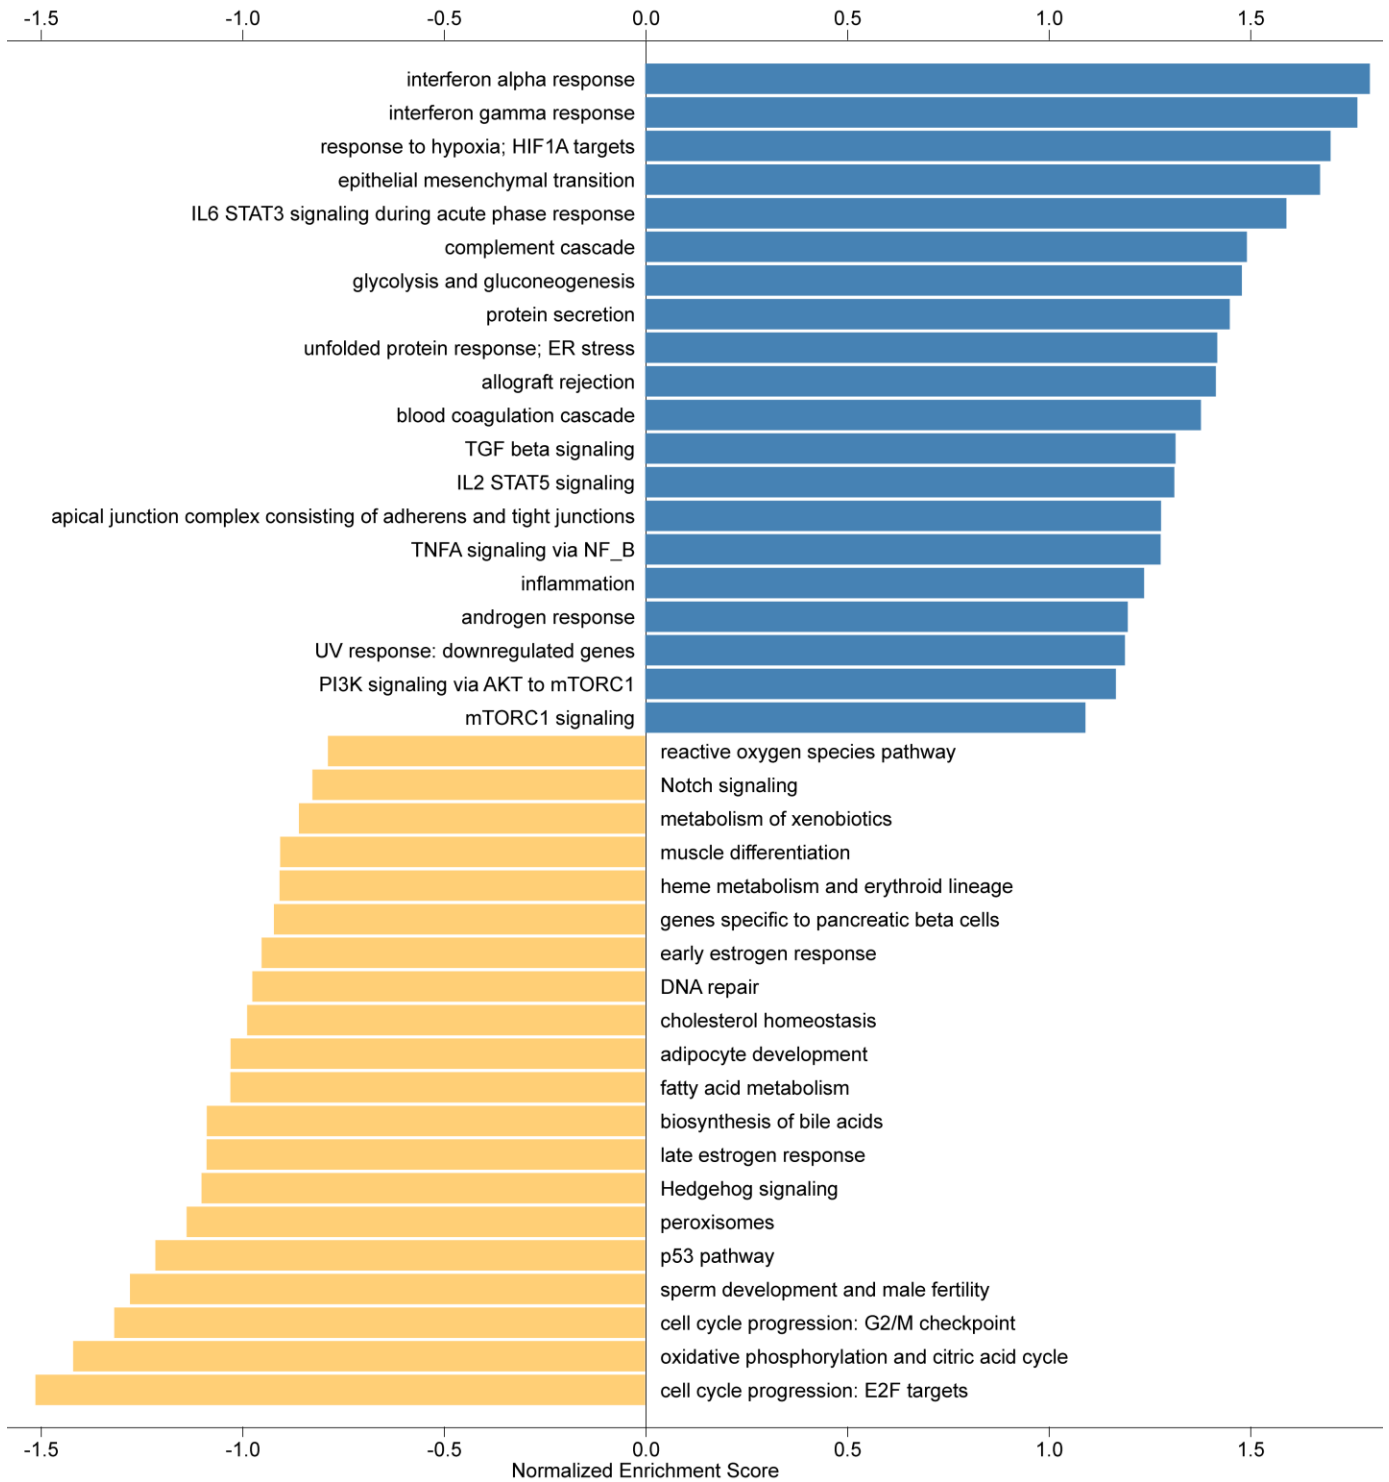

**Supplemental Figure S3. Gene set-enrichment analysis (GSEA) of RNA-seq data**

Primary human trophoblasts were isolated from first term placenta tissue and separated into EGFR+ vCTBs and HLAG+ EVT<sub>s</sub>.

RNA was isolated and quantified by RNA-seq. Data were analyzed by GSEA using Hallmark gene sets as database. Positive enrichment scores indicate enrichment in EVT<sub>s</sub> whereas negative enrichment scores indicate enrichment of the respective pathway in vCTBs.

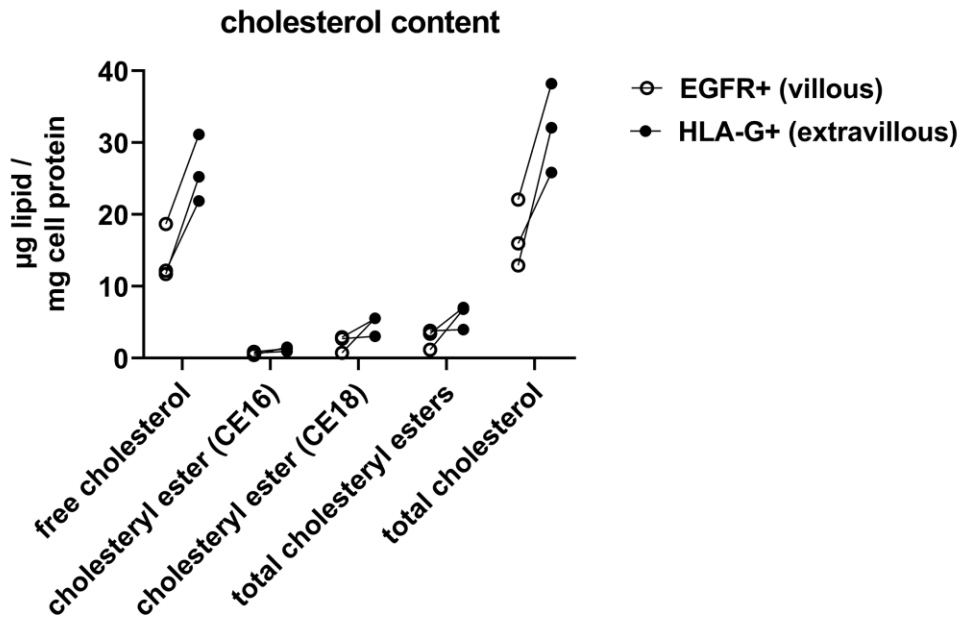

**Supplemental Figure S4. Extravillous trophoblasts display increased cholesterol content**

This figure shows an alternative graphical representation of the data presented in Figure 2 in the main manuscript.

Primary human trophoblasts were isolated from first trimester placenta tissue, separated into EGFR+ vCTBs and HLAG+ EVT<sub>s</sub> and analyzed by gas chromatography. Total cholesteryl ester content is split into CE16 and CE18 (cholesterol esterified to a fatty acid containing 16 and 18 C-atoms, respectively). Total cholesterol is calculated as the sum of free cholesterol and total cholesteryl esters. Each of the connected data points show the difference in cholesterol content between vCTBs and EVT<sub>s</sub>, derived from the very same placenta sample and isolation procedure. In total, three independent trophoblast isolations and gas chromatography analyses were performed. vCTB: villous cytotrophoblast; EVT: extravillous trophoblast.

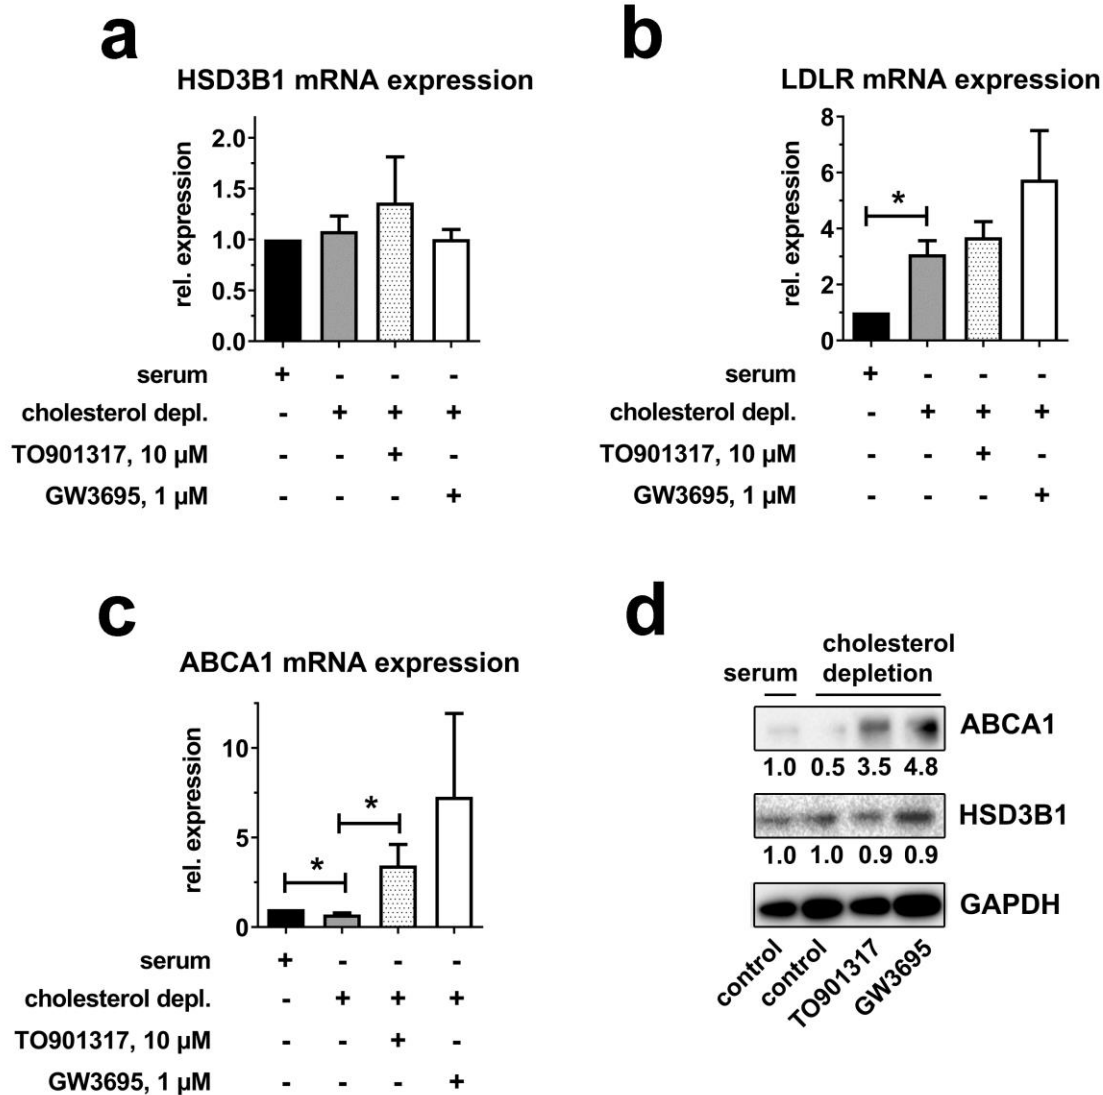

**Supplemental Figure S5 – HSD3B1 expression is not regulated by cholesterol depletion or LXR-activation.** Extravillous trophoblasts (EVTs) were isolated from first trimester human placenta and cultivated either in media containing 10% FBS or in cholesterol depletion media (10% lipoprotein-deficient serum instead of FBS, 5  $\mu$ M lovastatin, 100  $\mu$ M mevalonate) with or without LXR agonists (10  $\mu$ M TO901317 or 1  $\mu$ M GW3695) for 24 hrs. mRNA was isolated followed by qRT-PCR and expression was normalized to TATA box binding protein (TBP) expression. Data are derived from n=3 independent trophoblast isolations (a-c). Equally treated cells were analyzed by immunoblot and quantification of n=2 independent trophoblast isolations are shown (d). Error bars represent SDs.



## EVT: ABCA1 expression

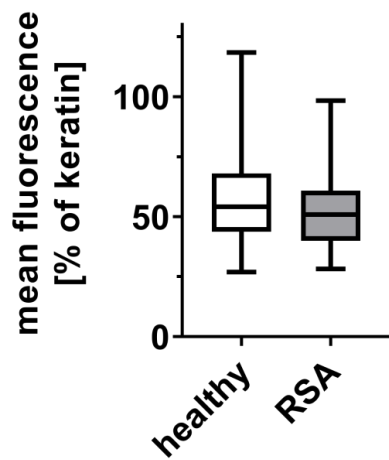

**Supplemental Figure S6 – ABCA1 expression in extravillous trophoblasts (EVTs) of patients with repeated idiopathic spontaneous abortions (RSA).** Decidual tissue section from RSA (n = 23) and age-matched healthy controls (n = 17) were double-stained with ABCA1 and cytokeratin 7 to identify trophoblasts. ABCA1 was quantified in CK7-positive EVTs. Data were quantified from 5 randomized fields per tissue section. Error bars represent SDs.
